# Supplementary material
Source: Research Square preprint supplement (doi:10.21203/rs.3.rs-9135357/v1)
Supplement: Supplementary file 1 [file d7e281e636d389bcc113e47b.docx]

**Harnessing Iron Industrial Wastes to High-Performance Geopolymer Concrete: Studies on Hot Mixing of One-Part Geopolymer Cement**

A. Tawfik 1, M.A. Hussien 2, F. Abd-El-Raoof 3, A.A. Shaltout 4, A.A. Elakhras 5, M.H. Seleem 6

1 Department of Refractories, Ceramics and Building Materials, Advanced Materials Technology and Mineral Resources Research Institute, National Research Centre,P.O. 12622, Dokki, Cairo, Egypt. E-mail: [tawfik_omar76@yahoo.com](mailto:tawfik_omar76@yahoo.com); [at.ahmed@nrc.sci.eg](mailto:at.ahmed@nrc.sci.eg) **(Corresponding Author)**

2 Department of Materials Engineering, Faculty of Engineering, Zagazig University, P.O. 44519, Zagazig, Egypt. E-mail: [mahmoudattia847@gmail.com](mailto:mahmoudattia847@gmail.com)

3 Refractories, Ceramics and Building Materials Department, Advanced Materials Technology and Mineral Resources Research Institute, National Research Centre, P.O. 12622, Dokki, Cairo, Egypt. E-mail: [f1abdelraoof@gmail.com](mailto:f1abdelraoof@gmail.com)

4 Spectroscopy Department, Physics Research Institute, National Research Centre, P.O. 12622, Dokki, Cairo, Egypt. E-mail: [shaltout_a@hotmail.com](mailto:shaltout_a@hotmail.com)

5 Faculty of Engineering, Zagazig University, P.O. 44519, Zagazig, Egypt. E-mail: [Ahmedali.ElAkhras@gmail.com](mailto:Ahmedali.ElAkhras@gmail.com)

6 Department of Materials Engineering, Faculty of Engineering, Zagazig University, P.O. 44519, Zagazig, Egypt. E-mail: [mhseleem1963@gmail.com](mailto:mhseleem1963@gmail.com)

**ABSTRACT**

Harnessing and efficiently industrializing iron waste for use in high-performance geopolymer cement and concrete was presented in current study. Performance of one-part geopolymer cement paste (GP) produced by alkaline activation of blast furnace slag using a synthetic solid activator was examined. The effect of activator-to-slag mass ratio (A/S) (0.16, 0.23, 0.31) on the kinetics of hydration, setting times, and strength properties of the GP was investigated under humid curing (HC) at 25° C and oven curing (OC) at 80° C for 7 h. Results revealed that increasing A/S ratios decreased the setting times and compressive strength of GP, with the highest strength recorded for OC samples after 1 day, while HC showed the highest values at later ages. The higher-strength mixture was selected to examine the effect of mixing water temperature (MWT) (25-80°C) on humid cured GP properties. The geopolymerization process was evaluated using infrared spectroscopy (FTIR), X-ray diffraction (XRD), EDS mapping, and transmitted electron microscopy (TEM). As the MWT increased to 80°C, the setting times decreased, while the compressive strength increased, reaching 23.5MPa after one day and 45.6MPa after 28 days compared to those measured at 25°C (***fcu1:*** 13.3MPa***,  fcu28:*** 40.5MPa). The microstructure of hydrated GP appeared to be amorphous and compact, though it became crystalline at higher MWT or heat-curing temperatures, forming aggregated nano-grains morphology. Based on the results of the GP, geopolymer concrete (GC) was prepared using electric arc furnace slag as the complete aggregate and incorporating either glass fiber or basalt fiber under optimal curing conditions that yielded the maximum strength (47.5MPa).

**Keywords:** One-partgeopolymer blends, Hot mixing method, Solid activator, Heat of hydration, TEM, Compressive strength, EAFS reusing, Fiber-reinforced geopolymer concrete

| **Table S1**: Effect of activator dosage on the compressive strength of the OC and HC GP samples. | | | | | | | | | | | |
| --- | --- | --- | --- | --- | --- | --- | --- | --- | --- | --- | --- |
| **Code** | **A/S** | **Compressive Strength, MPa** | | | | | | | | **Strength ratios** | |
| ***fcu1*** | **COV** | ***fcu3*** | **COV** | ***fcu7*** | **COV** | ***fcu28*** | **COV** | ***(fcu1/fcu28)*** | ***(fcu7/fcu28)*** |
| M1T25-OC80 | 0.16 | 19.20 | 0.083 | 22.40 | 0.071 | 22.94 | 0.04 | 37.34 | 0.025 | 0.51 | 0.61 |
| M2T25-OC80 | 0.23 | 14.40 | 0.111 | 20.27 | 0.121 | 20.80 | 0.077 | 28.27 | 0.086 | 0.51 | 0.74 |
| M3T25-OC80 | 0.31 | 14.40 | 0.062 | 18.14 | 0.094 | 19.74 | 0.051 | 28.00 | 0.04 | 0.51 | 0.71 |
| M1T25-HC25 | 0.16 | 13.34 | 0.069 | 28.80 | 0.056 | 29.34 | 0.031 | 40.54 | 0.023 | 0.33 | 0.72 |
| M2T25-HC25 | 0.23 | 12.00 | 0.067 | 27.00 | 0.045 | 28.8 | 0.028 | 39.47 | 0.042 | 0.30 | 0.73 |
| M3T25-HC25 | 0.31 | 10.15 | 0.04 | 18.50 | 0.053 | 21.87 | 0.084 | 30.94 | 0.079 | 0.33 | 0.71 |

COV: Coefficient of variance

| **Table S2**: Compressive strength for HC GP mixtures at different MWT | | | | | | | | | |
| --- | --- | --- | --- | --- | --- | --- | --- | --- | --- |
| **Mix Code** | **Compressive Strength, MPa** | | | | | | | | |
| ***fcu1*** | **C.O.V** | ***fcu3*** | **C.O.V** | ***fcu7*** | **C.O.V** | ***fcu28*** | **C.O.V** |
| M1T25-HC25 | 13.34 | 0.069 | 28.80 | 0.056 | 29.34 | 0.031 | 40.54 | 0.023 |
| M1T40-HC25 | 20.27 | 0.046 | 30.40 | 0.053 | 32.00 | 0.05 | 41.6 | 0.038 |
| M1T60-HC25 | 21.87 | 0.084 | 36.27 | 0.025 | 37.34 | 0.025 | 42.7 | 0.029 |
| M1T80-HC25 | 23.47 | 0.039 | 42.14 | 0.058 | 44.27 | 0.055 | 45.60 | 0.02 |
